# Supplementary material
Source: PubMed Central journal article supplement (PMC7968568)
Supplement: 40520_2021_1815_MOESM1_ESM.pdf [file 40520_2021_1815_MOESM1_ESM.pdf]

**Psychometric Properties of the STAI-Y scales and Normative Data in an Italian Elderly Population** [Aging Clinical and Experimental Research]

Ciro Rosario Ilardi<sup>a</sup>, Nadia Gamboz<sup>b</sup>, Alessandro Iavarone<sup>c\*</sup>, Sergio Chieffi<sup>d</sup>, Maria Antonella Brandimonte<sup>b</sup>

<sup>a</sup>Department of Psychology, University of Campania “Luigi Vanvitelli”, Caserta, Italy

<sup>b</sup>Laboratory of Experimental Psychology, Suor Orsola Benincasa University, Naples, Italy

<sup>c</sup>Neurological Unit, CTO Hospital, AORN “Ospedali dei Colli”, Naples, Italy

<sup>d</sup>Department of Experimental Medicine, University of Campania “Luigi Vanvitelli”, Naples, Italy

\*Corresponding Author: Alessandro Iavarone

e-mail address: aleiavarone@gmail.com

ORCID: 0000-0002-9596-5811

**Online Resource 1** Descriptive statistics, Spearman's correlation with total scores, and Pearson's corrected item-total correlation for each item

| Items                                                                                       | Mean (SD)   | Correlation with total score <sup>a</sup> | Item-total correlation |
|---------------------------------------------------------------------------------------------|-------------|-------------------------------------------|------------------------|
| <b>S-Anxiety scale</b>                                                                      |             |                                           |                        |
| 1. I feel calm                                                                              | 1.79 (0.86) | 0.45                                      | 0.50                   |
| 2. I feel secure                                                                            | 1.74 (0.89) | 0.51                                      | 0.63                   |
| 3. I am tense                                                                               | 1.82 (0.97) | 0.54                                      | 0.64                   |
| 4. I feel strained                                                                          | 1.66 (0.93) | 0.51                                      | 0.61                   |
| 5. I feel at ease                                                                           | 1.83 (0.98) | 0.59                                      | 0.68                   |
| 6. I feel upset                                                                             | 1.68 (0.87) | 0.52                                      | 0.63                   |
| 7. I am presently worrying over possible misfortunes                                        | 1.69 (0.88) | 0.47                                      | 0.55                   |
| 8. I feel satisfied                                                                         | 1.80 (0.89) | 0.52                                      | 0.60                   |
| 9. I feel frightened                                                                        | 2.03 (1.14) | 0.56                                      | 0.38                   |
| 10. I feel comfortable                                                                      | 2.13 (1.11) | 0.59                                      | 0.40                   |
| 11. I feel self-confident                                                                   | 1.78 (0.92) | 0.57                                      | 0.67                   |
| 12. I feel nervous                                                                          | 2.24 (1.13) | 0.65                                      | 0.51                   |
| 13. I am jittery                                                                            | 2.17 (1.15) | 0.19                                      | 0.16                   |
| 14. I feel indecisive                                                                       | 2.16 (1.12) | 0.67                                      | 0.54                   |
| 15. I am relaxed                                                                            | 2.23 (1.13) | 0.69                                      | 0.52                   |
| 16. I feel content                                                                          | 1.68 (0.88) | 0.46                                      | 0.60                   |
| 17. I am worried                                                                            | 1.63 (0.85) | 0.38                                      | 0.45                   |
| 18. I feel confused                                                                         | 1.66 (0.90) | 0.50                                      | 0.57                   |
| 19. I feel steady                                                                           | 1.76 (0.86) | 0.45                                      | 0.52                   |
| 20. I feel pleasant                                                                         | 1.61 (0.84) | 0.51                                      | 0.70                   |
| <b>T-Anxiety scale</b>                                                                      |             |                                           |                        |
| 1. I feel pleasant                                                                          | 1.78 (1.01) | 0.43                                      | 0.51                   |
| 2. I feel nervous and restless                                                              | 1.96 (1.05) | 0.63                                      | 0.63                   |
| 3. I feel satisfied with myself                                                             | 1.80 (1.03) | 0.60                                      | 0.67                   |
| 4. I wish I could be as happy as others seem to be                                          | 1.58 (0.82) | 0.36                                      | 0.37                   |
| 5. I feel like a failure                                                                    | 1.61 (0.93) | 0.51                                      | 0.56                   |
| 6. I feel rested                                                                            | 2.14 (1.11) | 0.56                                      | 0.57                   |
| 7. I am "calm, cool, and collected"                                                         | 2.25 (1.13) | 0.64                                      | 0.54                   |
| 8. I feel that difficulties are piling up so that I cannot overcome them                    | 1.91 (0.97) | 0.64                                      | 0.69                   |
| 9. I worry too much over something that really doesn't matter                               | 1.73 (0.89) | 0.35                                      | 0.39                   |
| 10. I am happy                                                                              | 1.78 (0.86) | 0.43                                      | 0.47                   |
| 11. I have disturbing thoughts                                                              | 1.92 (1.03) | 0.63                                      | 0.69                   |
| 12. I lack self-confidence                                                                  | 1.71 (0.87) | 0.37                                      | 0.39                   |
| 13. I feel secure                                                                           | 1.95 (1.04) | 0.64                                      | 0.66                   |
| 14. I make decisions easily                                                                 | 2.03 (1.15) | 0.64                                      | 0.67                   |
| 15. I feel inadequate                                                                       | 1.73 (1.12) | 0.54                                      | 0.49                   |
| 16. I am content                                                                            | 1.74 (0.88) | 0.38                                      | 0.49                   |
| 17. Some unimportant thought runs through my mind and bothers me                            | 1.73 (0.85) | 0.40                                      | 0.43                   |
| 18. I take disappointments so keenly that I can't put them out of my mind                   | 1.60 (0.88) | 0.41                                      | 0.47                   |
| 19. I am a steady person                                                                    | 1.69 (0.93) | 0.42                                      | 0.49                   |
| 20. I get in a state of tension or turmoil as I think over my recent concerns and interests | 2.56 (1.13) | 0.42                                      | 0.23                   |

<sup>a</sup> All correlation coefficients ( $r_{\text{rho}}$ ) are significant for  $p < .001$
