# Supplementary material
Source: PubMed Central journal article supplement (PMC7968568)
Supplement: 40520_2021_1815_MOESM2_ESM.pdf [file 40520_2021_1815_MOESM2_ESM.pdf]

**Psychometric Properties of the STAI-Y scales and Normative Data in an Italian Elderly Population** [Aging Clinical and Experimental Research]

Ciro Rosario Ilardi<sup>a</sup>, Nadia Gamboz<sup>b</sup>, Alessandro Iavarone<sup>c\*</sup>, Sergio Chieffi<sup>d</sup>, Maria Antonella Brandimonte<sup>b</sup>

<sup>a</sup>Department of Psychology, University of Campania “Luigi Vanvitelli”, Caserta, Italy

<sup>b</sup>Laboratory of Experimental Psychology, Suor Orsola Benincasa University, Naples, Italy

<sup>c</sup>Neurological Unit, CTO Hospital, AORN “Ospedali dei Colli”, Naples, Italy

<sup>d</sup>Department of Experimental Medicine, University of Campania “Luigi Vanvitelli”, Naples, Italy

\*Corresponding Author: Alessandro Iavarone

e-mail address: aleiavarone@gmail.com

ORCID: 0000-0002-9596-5811

**Online Resource 2** Results of Crawford & Garthwaite’s test for raw scores  $n$  SDs below or above the normative sample mean, and for cutoff, in the S-Anxiety and T-Anxiety scales

| Z plus 95% confidence limits |           |        |        |        |       |
|------------------------------|-----------|--------|--------|--------|-------|
| Standard deviation           | Raw score | $z$    | Lower  | Upper  | Width |
| <b>S-Anxiety Scale</b>       |           |        |        |        |       |
| 1 SD below                   | 25        | -1.054 | -1.182 | -0.925 | 0.25  |
| 1.5 SD below                 | 20        | -1.490 | -1.640 | -1.340 | 0.30  |
| 1 SD above                   | 49        | 1.04   | 0.912  | 1.168  | 0.25  |
| 1.5 SD above                 | 54        | 1.476  | 1.327  | 1.625  | 0.29  |
| Above the cutoff             | 68        | 2.698  | 2.475  | 2.920  | 0.44  |
| <b>T-Anxiety Scale</b>       |           |        |        |        |       |
| 1 SD below                   | 25        | -1.060 | -1.188 | -0.931 | 0.25  |
| 1.5 SD below                 | 22        | -1.321 | -1.462 | -1.179 | 0.28  |
| 1 SD above                   | 49        | 1.027  | 0.899  | 1.154  | 0.25  |
| 1.5 SD above                 | 55        | 1.549  | 1.395  | 1.701  | 0.30  |
| Above the cutoff             | 67        | 2.592  | 2.376  | 2.807  | 0.43  |

S-Anxiety Scale;  $N = 361$ , mean = 37.08, SD = 11.46, range = 20–76

T-Anxiety Scale;  $N = 361$ , mean = 37.19, SD = 11.50, range = 22–84
